# Supplementary material
Source: PubMed Central journal article supplement (PMC7211728)
Supplement: mmc1.pdf [file mmc1.pdf]

Supplementary table 1: Treatment scheme modified according to decision by local Hospital Commission

|                     | First phase<br>(March 12 <sup>th</sup> to March 20 <sup>th</sup> ) | Second Phase<br>(March 21 <sup>th</sup> to April 10 <sup>th</sup> ) | Dosages/duration                                                          |
|---------------------|--------------------------------------------------------------------|---------------------------------------------------------------------|---------------------------------------------------------------------------|
| Hydroxychloroquine  | Yes                                                                | Yes                                                                 | 400mg/12h on day 1 followed by 200mg/12h/ 10-14 days                      |
| Lopinavir/ritonavir | Yes                                                                | Yes                                                                 | 400 mg/100 mg twice a day<br>10-14 days                                   |
| β-Interferon        | Yes                                                                | No                                                                  | 250 µg sc/48 h<br>10 days                                                 |
| Azythromycin        | No                                                                 | Yes                                                                 | 500 mg on day 1, followed by 250 mg per day for the next 4 days/<br>5days |
| Corticosteroids *   | No                                                                 | Yes                                                                 | 1 mg/kg/day intravenous<br>5 days                                         |
| Tocilizumab **      | Yes                                                                | Yes                                                                 | < 75 Kg: 400 mg iv<br>>75 kg: 600 mg iv<br>1 day                          |

sc: subcutaneous, iv: intravenous

\*Corticosteroids were indicated in case of interstitial bilateral pneumonia with severe respiratory failure

\*\*Tocilizumab was indicated with these criteria: Interstitial pneumonia with severe respiratory failure (score = 2)/ Rapid respiratory worsening requiring non-invasive or invasive ventilation (COVID respiratory severity scale  $\geq 3$ )/ Presence of extrapulmonary organic failure (mainly Shock or SOFA score  $\geq 3$ )/ Presence of Critical Systemic Inflammatory Response criteria: high levels of IL-6 ( $> 40$  pg / ml) or, alternatively, high levels of dimer-D ( $> 1500$ ) or D-dimer in progressive increase/ Patients likely to be admitted to the ICU according to the criteria in force in each hospital

Table S2: Risk factors associated with in-hospital death

| Variables analyzed                              | Univariable HR     | p value | Adjusted HR        | P value |
|-------------------------------------------------|--------------------|---------|--------------------|---------|
| <b>Demographic and dialysis characteristics</b> |                    |         |                    |         |
| Age(years)                                      | 1.050(0.984-1.121) | 0.140   | 1.070(0.990-1.156) | 0.086   |
| Hemodialysis time (months)                      | 1.007(1.000-1.003) | 0.039   | 1.008(1.001-1.015) | 0.019   |
| Charlson comorbidity Index                      | 0.772(0.533-1.117) | 0.170   |                    |         |
| O <sub>2</sub> baseline saturation(%)           | 0.901(0.815-0.996) | 0.041   |                    |         |
| <b>Laboratory findings(7 days)</b>              |                    |         |                    |         |
| <b>Model 1</b>                                  |                    |         |                    |         |
| Age(years)                                      | 1.050(0.984-1.121) | 0.140   | 1.058(0.956-1.171) | 0.272   |
| Lymphocyte count (x10 <sup>9</sup> )            | 0.996(0.992-1.000) | 0.034   | 0.996(0.992-1.000) | 0.056   |
| <b>Model 2</b>                                  |                    |         |                    |         |
| Age(years)                                      | 1.050(0.984-1.121) | 0.140   | 1.092(0.984-1.212) | 0.097   |
| LDH(U/l)                                        | 1.004(1.001-1.008) | 0.023   | 1.006(1.001-1.011) | 0.016   |
| <b>Treatment scheme</b>                         |                    |         |                    |         |
| <b>Model 3</b>                                  |                    |         |                    |         |
| Age (years)                                     | 1.050(0.984-1.121) | 0.140   | 1.116(1.008-1.236) | 0.035   |
| Azithromycin                                    | 0.130(0.016-1.036) | 0.054   | 0.057(0.005-0.697) | 0.025   |
| Lopinavir/ritonavir                             | 0.328(0.041-2.622) | 0.293   | 0.969(0.107-0.874) | 0.978   |
| <b>Model 4</b>                                  |                    |         |                    |         |
| Age (years)                                     | 1.050(0.984-1.121) | 0.140   | 1.064(0.996-1.138) | 0.067   |
| Corticosteroids(yes)                            | 0.181(0.039-0.843) | 0.029   | 0.154(0.033-0.724) | 0.018   |

Table S3. Baseline characteristics, clinical and radiological features comparing patients who received either Azithromycin or corticosteroids with those who did not receive these treatments.

|                                                      | <b>Azithromycin (no)<br/>(n=23)</b> | <b>Azithromycin (yes)<br/>(n=13)</b> | <b>p</b> |
|------------------------------------------------------|-------------------------------------|--------------------------------------|----------|
| Age, years                                           | 70±12                               | 73±13                                | 0.370    |
| Male                                                 | 14(64%)                             | 9(69%)                               | 0.448    |
| Body mass Index                                      | 26.8± 4.9                           | 26,2 ±3.2                            | 0.724    |
| <b>Comorbidities</b>                                 |                                     |                                      |          |
| Hypertension                                         | 22(96%)                             | 13(100%)                             | 1.000    |
| Diabetes                                             | 14(61%)                             | 9(69%)                               | 0.727    |
| Coronary heart disease                               | 5(22%)                              | 3(23%)                               | 1.000    |
| Dyslipidemia                                         | 15(65%)                             | 9/69%                                | 1.000    |
| Chronic obstructive lung disease                     | 5(22%)                              | 2(15%)                               | 1.000    |
| Atrial fibrillation                                  | 6(26%)                              | 5(38%)                               | 0.475    |
| Charlson index                                       | 5,39 ± 1,92                         | 5,85 ± 1,51                          | 0.469    |
| <b>Symptoms</b>                                      |                                     |                                      |          |
| Fever                                                | 14 (61%)                            | 10(77%)                              | 0.467    |
| Cough                                                | 11(48%)                             | 5(38%)                               | 0.731    |
| Fatigue                                              | 7(30%)                              | 2(15%)                               | 0.438    |
| Diarrhoea, nausea or vomiting                        | 3(13%)                              | 3(23%)                               | 0.645    |
| Time from illness onset to hospital admission (days) | 3.04(0-15)                          | 2.46(0-7)                            | 0.584    |
| Basal Oxygen saturation                              | 93.2±4.9                            | 94.4±3.1                             | 0.406    |
| <b>Admission Chest X-Ray</b>                         |                                     |                                      |          |
| Bilateral peripheral ground-glass opacity            | 17(65%)                             | 7(54%)                               | 0.551    |
| Unilateral opacity                                   | 4(17%)                              | 2(15%)                               |          |
| Normal X-ray                                         | 4(17%)                              | 3(23%)                               |          |
| <b>Mortality (yes)</b>                               | 10(43%)                             | 1(8%)                                | 0.031    |

|                                                      | <b>Corticosteroids(no)<br/>(n=19)</b> | <b>Corticosteroids (yes)<br/>(n=17)</b> | <b>p</b> |
|------------------------------------------------------|---------------------------------------|-----------------------------------------|----------|
| Age, years                                           | 70.1 ± 13.3                           | 71.9 ± 11.4                             | 0.662    |
| Male                                                 | 13 (68%)                              | 10 (59%)                                | 0.730    |
| Body mass Index                                      | 25.9 ± 3.05                           | 27.3 ± 5.48                             | 0.427    |
| <b><u>Comorbidities</u></b>                          |                                       |                                         |          |
| Hypertension                                         | 18 (95%)                              | 17 (100%)                               | 1.000    |
| Diabetes                                             | 11 (58%)                              | 12 (71%)                                | 0.502    |
| Coronary heart disease                               | 4 (21%)                               | 4 (23.5%)                               | 1.000    |
| Dyslipidemia                                         | 12 (63%)                              | 12 (71%)                                | 0.732    |
| Chronic obstructive lung disease                     | 3 (16%)                               | 4 (23.5%)                               | 0.684    |
| Atrial fibrillation                                  | 7 (37%)                               | 4 (23.5%)                               | 0.481    |
| Charlson index                                       | 5.21 ± 1.9                            | 5.94 ± 1.6                              | 0.224    |
| <b><u>Symptoms</u></b>                               |                                       |                                         |          |
| Fever                                                | 12 (63%)                              | 12 (71%)                                | 0.732    |
| Cough                                                | 8 (42%)                               | 8 (47%)                                 | 1.000    |
| Fatigue                                              | 6 (32%)                               | 3 (18%)                                 | 0.451    |
| Diarrhoea, nausea or vomiting                        | 1 (5%)                                | 4 (23.5%)                               | 0.391    |
| Time from illness onset to hospital admission (days) | 3.00 (0-10)                           | 2.45 (0-15)                             | 0.579    |
| Basal Oxygen saturation                              | 93.5 ± 5.3                            | 93.4 ± 3.2                              | 0.874    |
| <b><u>Admission Chest X-Ray</u></b>                  |                                       |                                         |          |
| Bilateral peripheral ground-glass opacity            | 10 (53%)                              | 12 (71%)                                | 0.273    |
| Unilateral opacity                                   | 5 (26%)                               | 2 (12%)                                 |          |
| Normal X-ray                                         | 4 (21%)                               | 3 (17%)                                 |          |
| <b><u>Mortality (yes)</u></b>                        | 9 (48%)                               | 2 (11%)                                 | 0.031    |
